# Supplementary material
Source: Copernicus journal article supplement (doi:10.5194/bg-23-4583-2026)
Supplement: Supplementary file 1 [file bg-23-4583-2026-supplement.pdf]

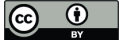

*Supplement of*

## **Livestock grazing, plant community and abiotic factors shape blue carbon stocks in Nordic coastal marshes**

**Anaïs Richard et al.**

*Correspondence to:* Anaïs Richard (anaïs.richard@biology.sdu.dk)

The copyright of individual parts of the supplement might differ from the article licence.

# Supplement material

30 **Figure S1: Relation between total soil organic carbon (%) and loss of ignition (LOI, %), indicator of soil organic matter.**

35 **Points represent the data for grazed (round point, n = 239) and ungrazed (square point, n = 275) areas along the 12 sites. For Als, Tullgarn North, Trondheim, Lenholmen and Seden Strand 3 cores per management type were used, compared to one core per management for the other sites. Different slicing resolutions were used depending on the soil compression factor. The black line represents the second-order polynomial regression fitted using a linear model. The grey area corresponds to 95 % level of confidence.**

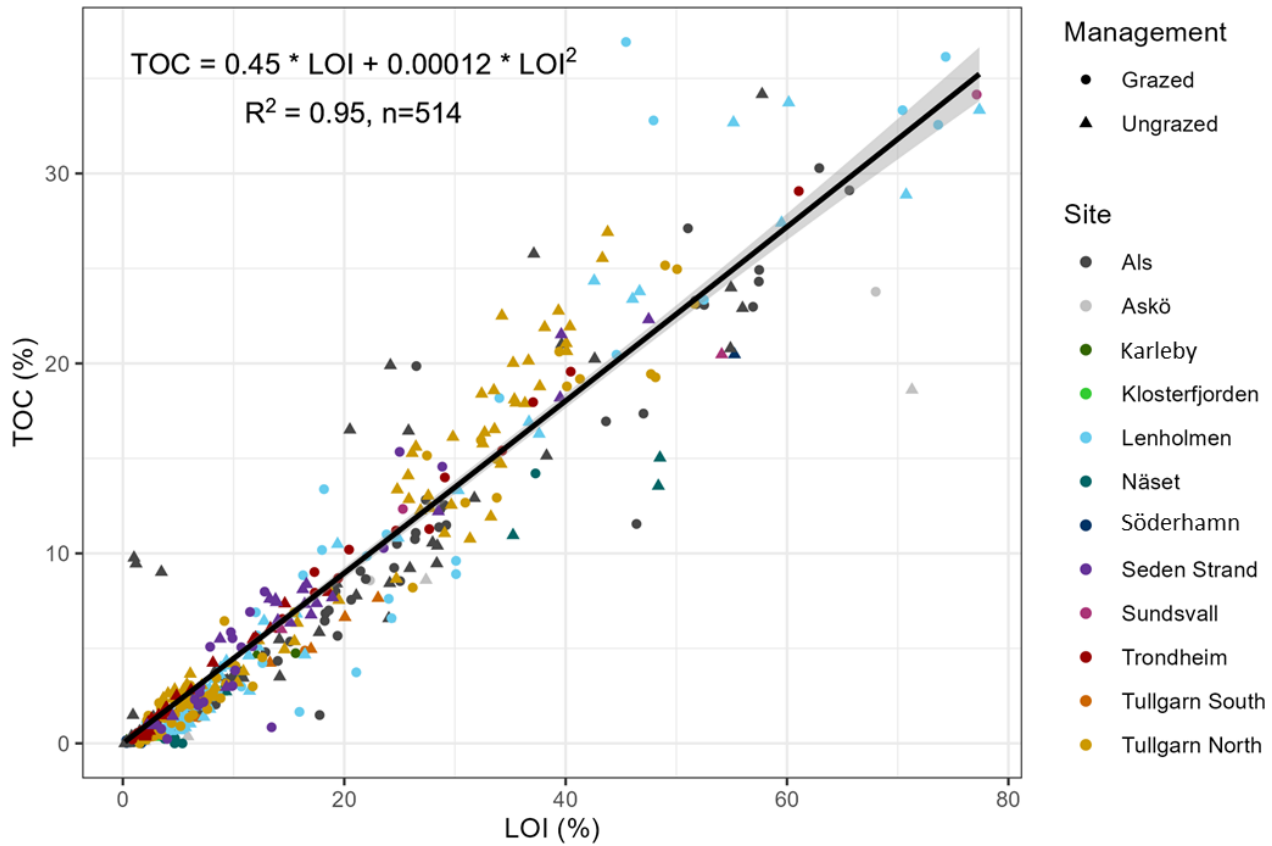

40

Figure S2: Relation between total soil nitrogen (%) and loss of ignition (LOI, %), indicator of soil organic matter.

45 Points represent the data for grazed (round point, n = 231) and ungrazed (square point, n = 256) areas along the 12 sites. For Als, Tullgarn North, Trondheim, Lenholmen and Seden Strand 3 cores per management type were used, compared to one core per management for the other sites. Different slicing resolutions were used depending on the soil compression factor. The black line represents the second-order polynomial regression fitted using a linear model. The grey area corresponds to 95 % level of confidence.

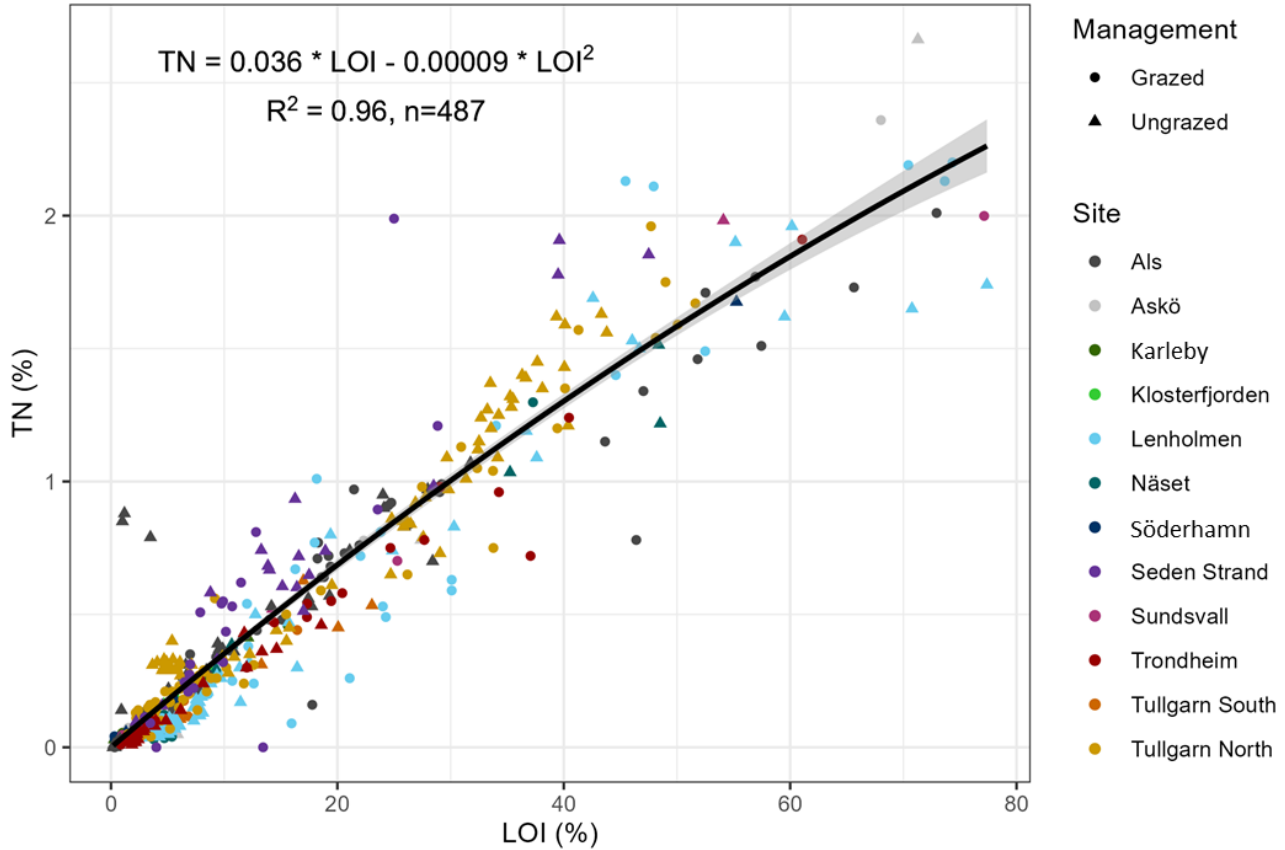

50

55

**Figure S3: Spearman correlation between plant community descriptors and environmental variables**

60 Spearman correlation coefficients between plant community descriptors (left table): mean vegetation height estimated (cm; Mean height), maximum vegetation height measured (cm; Max height), *Phragmites australis* cover estimated (%; *P. australis* cover), Species richness, Shannon-Wiener index, Simpson index and evenness, Pielou evenness and Hill index calculated). Spearman correlation coefficients between environmental variables (right table): Latitude (°), Longitude (°), Mean water salinity and temperature (°C), tidal amplitude (cm), and land uplift values are relative to geoid (mm yr<sup>-1</sup>). Positive Spearman correlation coefficient (from 1 to 0) is indicated in blue, and negative value (from 0 to -1) in grey. Significant coefficients are not crossed out ( $p < 0.05$ ), and non-significant coefficients are crossed out ( $p > 0.05$ ).

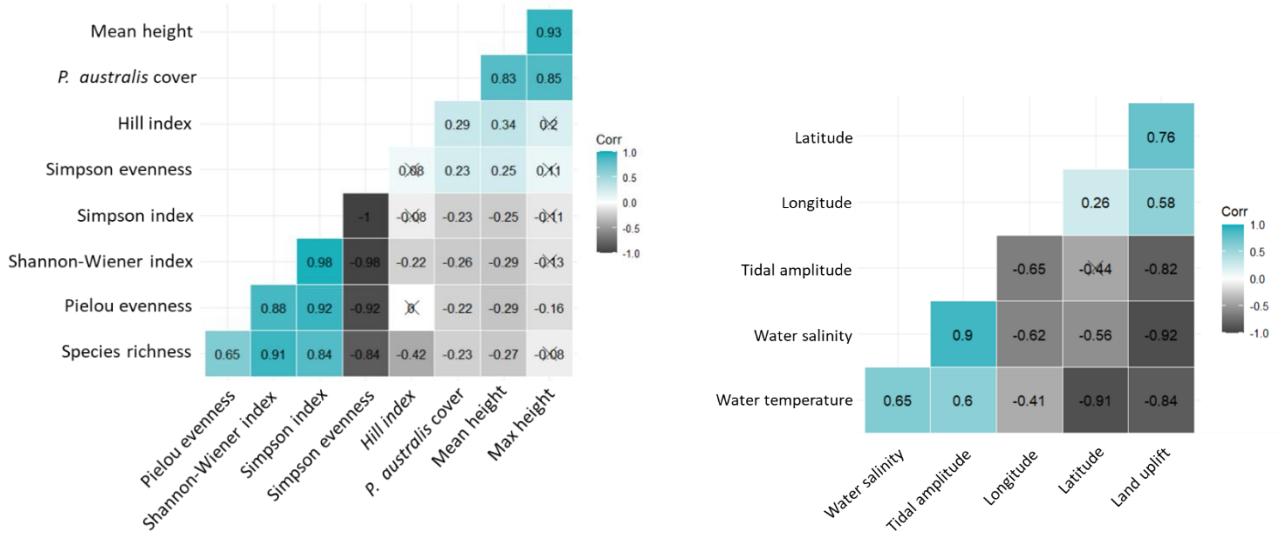

65

70

75

**Figure S4: Spearman correlation between soil characteristics descriptors**

80 **Spearman correlation coefficients between soil characteristics descriptors (left table; mean on the first 50 cm depth): water content (%), dry bulk density ( $\text{g DW cm}^{-3}$ ), dry matter content (%), percentage of silt and clay ( $< 63\mu\text{m}$ ) and D50 ( $\mu\text{m}$ ), representing the grain size where 50 % of the volume sample is below that value. Positive Spearman correlation coefficient (from 1 to 0) is indicated in blue, and negative value (from 0 to -1) in grey. Significant coefficients are not crossed out ( $p < 0.05$ ).**

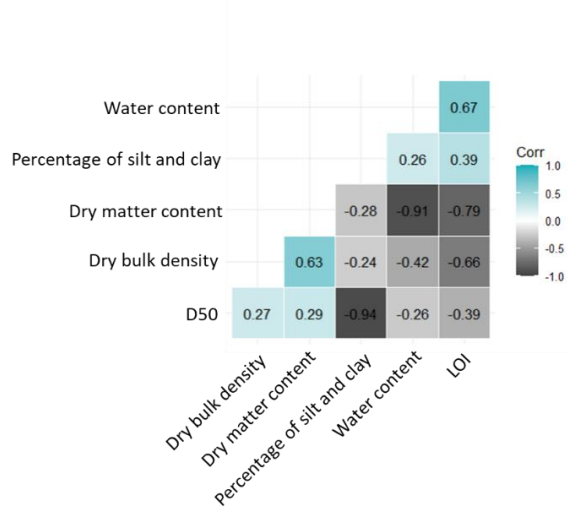

85

90

95

100

**Table S1: List of identified species**Mean cover  $\pm$  sd (n = 36 quadrats in grazed areas, n = 33 in ungrazed areas).

| Species                        | Grazed area (%)   | Ungrazed area (%) |
|--------------------------------|-------------------|-------------------|
| <i>Achillea millefolium</i>    | 0.03 $\pm$ 0.17   | 0                 |
| <i>Agrostis capillaris</i>     | 0.76 $\pm$ 2.21   | 0.28 $\pm$ 1.67   |
| <i>Agrostis gigantea</i>       | 0.03 $\pm$ 0.17   | 0.42 $\pm$ 2.50   |
| <i>Agrostis stolonifera</i>    | 11.52 $\pm$ 22.38 | 4.86 $\pm$ 9.24   |
| <i>Alopecurus geniculatus</i>  | 0.03 $\pm$ 0.17   | 0                 |
| <i>Angelica sylvestris</i>     | 0.30 $\pm$ 1.21   | 0                 |
| <i>Anthriscus sylvestris</i>   | 0                 | 2.08 $\pm$ 7.11   |
| <i>Argentina anserina</i>      | 7.61 $\pm$ 12.30  | 2.78 $\pm$ 9.44   |
| <i>Armeria maritima</i>        | 0.09 $\pm$ 0.38   | 0                 |
| <i>Arrhenatherum elatius</i>   | 0                 | 1.94 $\pm$ 11.67  |
| <i>Artemisia maritima</i>      | 0                 | 1.28 $\pm$ 5.26   |
| <i>Artemisia vulgaris</i>      | 0.06 $\pm$ 0.35   | 0                 |
| <i>Atriplex glabriuscula</i>   | 0                 | 2.00 $\pm$ 10.01  |
| <i>Atriplex prostrata</i>      | 0                 | 0.33 $\pm$ 1.67   |
| <i>Atriplex</i> sp.            | 0.03 $\pm$ 0.17   | 0.47 $\pm$ 1.84   |
| <i>Blysmus compressus</i>      | 0.03 $\pm$ 0.17   | 0                 |
| <i>Bolboschoenus maritimus</i> | 0                 | 7.17 $\pm$ 16.72  |
| <i>Calamagrostis arenaria</i>  | 8.03 $\pm$ 25.8   | 0                 |
| <i>Calamagrostis canescens</i> | 7.27 $\pm$ 23.39  | 0.14 $\pm$ 0.83   |
| <i>Calamagrostis neglecta</i>  | 0.24 $\pm$ 1.39   | 5.00 $\pm$ 18.75  |
| <i>Caltha palustris</i>        | 0.36 $\pm$ 1.76   | 0.22 $\pm$ 0.90   |
| <i>Calystegia sepium</i>       | 0                 | 1.25 $\pm$ 5.53   |
| <i>Carex aquatilis</i>         | 1.52 $\pm$ 7.01   | 0.69 $\pm$ 4.17   |
| <i>Carex disticha</i>          | 0.45 $\pm$ 2.61   | 0                 |
| <i>Carex hirta</i>             | 0.15 $\pm$ 0.87   | 0                 |
| <i>Carex nigra</i>             | 5.61 $\pm$ 12.59  | 0                 |
| <i>Carex</i> sp.               | 0.03 $\pm$ 0.17   | 0                 |
| <i>Cicuta virosa</i>           | 0                 | 0.06 $\pm$ 0.33   |
| <i>Cirsium arvense</i>         | 0                 | 0.72 $\pm$ 2.71   |
| <i>Comarum palustre</i>        | 2.88 $\pm$ 9.92   | 0.42 $\pm$ 2.50   |
| <i>Dactylis glomerata</i>      | 0                 | 0.03 $\pm$ 0.17   |
| <i>Deschampsia cespitosa</i>   | 1.97 $\pm$ 7.28   | 2.78 $\pm$ 13.65  |
| <i>Eleocharis palustris</i>    | 0                 | 1.28 $\pm$ 6.69   |
| <i>Eleocharis uniglumis</i>    | 0                 | 1.39 $\pm$ 5.93   |
| <i>Elymus caninus</i>          | 0.52 $\pm$ 2.62   | 0                 |

|                                |               |               |
|--------------------------------|---------------|---------------|
| <i>Elymus repens</i>           | 0.30 ± 1.21   | 6.64 ± 17.59  |
| <i>Empetrum nigrum</i>         | 0.76 ± 3.56   | 0             |
| <i>Equisetum arvense</i>       | 0             | 0.56 ± 3.33   |
| <i>Festuca pratensis</i>       | 1.67 ± 6.45   | 0             |
| <i>Festuca rubra</i>           | 11.67 ± 21.82 | 12.08 ± 26.49 |
| <i>Filipendula ulmaria</i>     | 0.09 ± 0.38   | 5.53 ± 17.91  |
| <i>Galium aparine</i>          | 0             | 1.42 ± 5.93   |
| <i>Galium palustre</i>         | 0.88 ± 2.53   | 5.33 ± 11.99  |
| <i>Galium trifidum</i>         | 1.27 ± 4.84   | 0             |
| <i>Galium uliginosum</i>       | 0.03 ± 0.17   | 0             |
| <i>Galium verum</i>            | 0.45 ± 2.61   | 0             |
| <i>Geranium palustre</i>       | 0.03 ± 0.17   | 0             |
| <i>Glechoma hederacea</i>      | 0             | 0.06 ± 0.23   |
| <i>Hieracium umbellatum</i>    | 0.39 ± 1.77   | 0             |
| <i>Hierochloe odorata</i>      | 0             | 0.28 ± 1.67   |
| <i>Hylotelephium telephium</i> | 0.21 ± 0.93   | 0             |
| <i>Impatiens glandulifera</i>  | 0             | 0.03 ± 0.17   |
| <i>Juncus articulatus</i>      | 0.45 ± 2.61   | 0             |
| <i>Juncus compressus</i>       | 5.88 ± 19.01  | 0.14 ± 0.83   |
| <i>Juncus effusus</i>          | 0.15 ± 0.87   | 0             |
| <i>Juncus gerardii</i>         | 15.73 ± 27.05 | 1.89 ± 7.37   |
| <i>Lathyrus palustris</i>      | 0             | 0.83 ± 3.68   |
| <i>Lathyrus pratensis</i>      | 0             | 1.67 ± 10.00  |
| <i>Leymus arenarius</i>        | 0.82 ± 3.57   | 0             |
| <i>Limonium humile</i>         | 0.09 ± 0.52   | 0             |
| <i>Linaria vulgaris</i>        | 0.18 ± 0.88   | 0             |
| <i>Lolium perenne</i>          | 0.91 ± 3.84   | 0             |
| <i>Lysimachia europaea</i>     | 0             | 0.03 ± 0.17   |
| <i>Lysimachia maritima</i>     | 3.58 ± 5.85   | 3.03 ± 10.36  |
| <i>Lysimachia thyrsoflora</i>  | 0.15 ± 0.87   | 2.64 ± 11.74  |
| <i>Lythrum salicaria</i>       | 0.03 ± 0.17   | 0.69 ± 2.44   |
| <i>Mentha aquatica</i>         | 0             | 7.50 ± 17.99  |
| <i>Myosotis laxa</i>           | 0             | 3.11 ± 10.29  |
| <i>Ophioglossum vulgatum</i>   | 0             | 0.14 ± 0.83   |
| <i>Persicaria amphibia</i>     | 0             | 0.42 ± 2.50   |
| <i>Peucedanum palustre</i>     | 0             | 0.14 ± 0.83   |
| <i>Phalaris arundinacea</i>    | 0             | 1.11 ± 3.98   |
| <i>Phragmites australis</i>    | 3.67 ± 5.88   | 69.86 ± 32.03 |
| <i>Plantago major</i>          | 0.03 ± 0.17   | 0             |

|                                       |              |             |
|---------------------------------------|--------------|-------------|
| <i>Plantago maritima</i>              | 8.91 ± 15.94 | 0.72 ± 4.17 |
| <i>Plantago media</i>                 | 0.15 ± 0.87  | 0           |
| <i>Poa annua</i>                      | 0.33 ± 1.22  | 0           |
| <i>Poa humilis</i>                    | 1.06 ± 3.9   | 0           |
| Poaceae                               | 0.12 ± 0.70  | 0           |
| <i>Potentilla aurea</i>               | 0.15 ± 0.87  | 0           |
| <i>Ranunculus acris</i>               | 0.09 ± 0.38  | 0.03 ± 0.17 |
| <i>Ranunculus repens</i>              | 0.61 ± 2.08  | 0           |
| <i>Ranunculus</i> sp.                 | 0            | 0.22 ± 0.96 |
| <i>Rubus idaeus</i>                   | 0            | 2.08 ± 8.23 |
| <i>Rumex acetoca</i>                  | 0.18 ± 0.88  | 0           |
| <i>Rumex crispus</i>                  | 0            | 0.11 ± 0.46 |
| <i>Salicornia europaea</i>            | 0.58 ± 1.94  | 0           |
| <i>Salix phylicifolia</i>             | 0            | 0.03 ± 0.17 |
| <i>Schoenoplectus tabernaemontani</i> | 0            | 0.14 ± 0.83 |
| <i>Scutellaria galericulata</i>       | 0            | 0.03 ± 0.17 |
| <i>Scrozonerooides autumnalis</i>     | 3.45 ± 7.93  | 0.56 ± 3.33 |
| <i>Senecio vulgaris</i>               | 0            | 0.14 ± 0.83 |
| <i>Silene uniflora</i>                | 0.03 ± 0.17  | 0           |
| <i>Spergularia media</i>              | 0.18 ± 0.88  | 0           |
| <i>Stellaria graminea</i>             | 0.55 ± 1.46  | 0           |
| <i>Stellaria palustris</i>            | 0.15 ± 0.87  | 0.14 ± 0.83 |
| <i>Suaeda maritima</i>                | 8.58 ± 27.56 | 0           |
| <i>Tanacetum vulgare</i>              | 2.58 ± 8.49  | 0           |
| <i>Thysselinum palustre</i>           | 0            | 0.89 ± 4.23 |
| <i>Trifolium fragiferum</i>           | 3.48 ± 9.80  | 0           |
| <i>Trifolium repens</i>               | 2.45 ± 7.19  | 0.28 ± 1.67 |
| <i>Triglochin maritima</i>            | 0.79 ± 2.19  | 1.11 ± 3.98 |
| <i>Triglochin palustris</i>           | 0.15 ± 0.87  | 0           |
| <i>Tripolium pannonicum</i>           | 0            | 0.03 ± 0.17 |
| <i>Urtica dioica</i>                  | 0            | 4.58 ± 14.8 |
| <i>Valeriana excelsa</i>              | 0            | 0.44 ± 2.5  |
| <i>Vicia cracca</i>                   | 0.18 ± 0.88  | 0           |
| <i>Vicia villosa</i>                  | 0.09 ± 0.38  | 0           |

**Table S2: Mean and maximum vegetation height in 1x1 m quadrat, aboveground and belowground (sum of the first 50 cm) biomass in 25 x 25 cm quadrat, and biodiversity indices for each grazed and ungrazed sites. Data correspond to the mean and standard deviation (n = 3).**

| Sites          | Management | Mean vegetation height (cm) | Maximum vegetation height (cm) | Aboveground biomass (g DW m <sup>-2</sup> ) | Belowground biomass (g DW m <sup>-2</sup> ) | Species richness | Shannon-Wiener index | Simpson index | Simpson equitability | Pielou equitability | Hill index |
|----------------|------------|-----------------------------|--------------------------------|---------------------------------------------|---------------------------------------------|------------------|----------------------|---------------|----------------------|---------------------|------------|
| Als            | Grazed     | 7.7 ± 1.8                   | 16.1 ± 1.4                     | 282.1 ± 104.5                               | 6317.9 ± 1210.3                             | 6.0 ± 1.0        | 1.0 ± 0.2            | 0.5 ± 0.1     | 0.4 ± 0.1            | 0.6 ± 0.1           | 0.8 ± 0.0  |
|                | Ungrazed   | 93.1 ± 9.4                  | 139.8 ± 5.7                    | 1425.4 ± 644.2                              | 8889.6 ± 3188.1                             | 7.7 ± 1.2        | 1.4 ± 0.1            | 0.7 ± 0.0     | 0.2 ± 0.0            | 0.7 ± 0.1           | 0.8 ± 0.0  |
| Askö           | Grazed     | 6.0 ± 3.5                   | 32.7 ± 2.5                     | 263.5 ± 67.1                                | 9851.1 ± 4049.2                             | 7.7 ± 1.5        | 1.4 ± 0.3            | 0.7 ± 0.1     | 0.2 ± 0.1            | 0.7 ± 0.1           | 0.8 ± 0.0  |
|                | Ungrazed   | 80.0 ± 26.5                 | 180.3 ± 32.0                   | 1389.0 ± 478.5                              | 4286.5 ± 947.5                              | 6.3 ± 0.6        | 1.5 ± 0.0            | 0.7 ± 0.0     | 0.2 ± 0.0            | 0.8 ± 0.0           | 0.9 ± 0.0  |
| Karleby        | Grazed     | 13.3 ± 2.9                  | 50.3 ± 4.6                     | 290.6 ± 32.7                                | 8219.5 ± 938.8                              | 8.3 ± 0.6        | 1.6 ± 0.1            | 0.8 ± 0.0     | 0.2 ± 0.0            | 0.8 ± 0.1           | 0.8 ± 0.1  |
|                | Ungrazed   | 120.0 ± 10.0                | 269.0 ± 11.5                   | 3564.9 ± 2048.8                             | 5805.0 ± 4034.9                             | 6.7 ± 0.6        | 1.2 ± 0.2            | 0.6 ± 0.1     | 0.3 ± 0.1            | 0.7 ± 0.1           | 0.8 ± 0.0  |
| Klosterfjorden | Grazed     | -                           | -                              | -                                           | -                                           | -                | -                    | -             | -                    | -                   | -          |
|                | Ungrazed   | 92.3 ± 6.8                  | 195.3 ± 2.9                    | 2673.6 ± 1453.7                             | 4277.1 ± 2270.7                             | 11.0 ± 1.7       | 1.9 ± 0.3            | 0.8 ± 0.1     | 0.1 ± 0.1            | 0.8 ± 0.1           | 0.8 ± 0.1  |
| Lenholmen      | Grazed     | 10.7 ± 1.2                  | 17.7 ± 2.5                     | 153.9 ± 31.9                                | 9259.7 ± 3713.0                             | 6.7 ± 1.5        | 1.6 ± 0.4            | 0.8 ± 0.1     | 0.2 ± 0.1            | 0.8 ± 0.1           | 0.9 ± 0.1  |
|                | Ungrazed   | 30.0 ± 0.0                  | 106.7 ± 55.1                   | 539.9 ± 54.7                                | 10435.5 ± 4197.0                            | 9.0 ± 1.0        | 2.0 ± 0.1            | 0.8 ± 0.0     | 0.1 ± 0.0            | 0.9 ± 0.1           | 0.8 ± 0.1  |
| Naset          | Grazed     | 13.7 ± 7.8                  | 58.5 ± 9.6                     | 250.5 ± 78.9                                | 6130.0 ± 1949.8                             | 8.3 ± 2.3        | 1.7 ± 0.1            | 0.8 ± 0.0     | 0.2 ± 0.0            | 0.8 ± 0.1           | 0.7 ± 0.1  |
|                | Ungrazed   | 176.7 ± 25.2                | 219.2 ± 12.5                   | 1410.0 ± 125.8                              | 17370.0 ± 5321.5                            | 2.7 ± 0.6        | 0.3 ± 0.1            | 0.1 ± 0.1     | 0.9 ± 0.1            | 0.3 ± 0.1           | 0.9 ± 0.0  |
| Söderhamn      | Grazed     | 28.3 ± 7.6                  | 100.2 ± 26.8                   | 437.6 ± 48.7                                | 2438.0 ± 446.5                              | 12.3 ± 2.1       | 1.6 ± 0.1            | 0.7 ± 0.1     | 0.2 ± 0.1            | 0.7 ± 0.1           | 0.6 ± 0.0  |
|                | Ungrazed   | 56.3 ± 3.2                  | 176.3 ± 33.5                   | 718.5 ± 150.8                               | 7254.6 ± 3207.9                             | 8.3 ± 2.1        | 1.7 ± 0.2            | 0.8 ± 0.0     | 0.1 ± 0.0            | 0.8 ± 0.0           | 0.9 ± 0.0  |
| Seden Strand   | Grazed     | 27.8 ± 0.9                  | 43.2 ± 3.9                     | 374.5 ± 138.8                               | 6598.5 ± 2491.4                             | 2.3 ± 0.6        | 0.3 ± 0.1            | 0.1 ± 0.0     | 0.9 ± 0.0            | 0.3 ± 0.1           | 0.9 ± 0.0  |
|                | Ungrazed   | 118.0 ± 12.2                | 189.0 ± 19.1                   | 750.3 ± 350.0                               | 9302.9 ± 304.8                              | 3.0 ± 1.0        | 0.3 ± 0.2            | 0.1 ± 0.1     | 0.9 ± 0.1            | 0.2 ± 0.2           | 0.9 ± 0.1  |
| Sundsvall      | Grazed     | 21.7 ± 2.9                  | 62.3 ± 5.1                     | 550.5 ± 169.8                               | 7446.1 ± 2504.1                             | 8.3 ± 1.2        | 1.6 ± 0.2            | 0.7 ± 0.0     | 0.2 ± 0.0            | 0.8 ± 0.0           | 0.8 ± 0.0  |
|                | Ungrazed   | 80.0 ± 10.0                 | 191.3 ± 15.5                   | 1674.7 ± 213.8                              | 4206.5 ± 780.6                              | 7.0 ± 2.0        | 1.2 ± 0.5            | 0.6 ± 0.2     | 0.3 ± 0.2            | 0.6 ± 0.2           | 0.8 ± 0.0  |
| Trondheim      | Grazed     | 17.3 ± 7.6                  | 49.8 ± 12.2                    | 619.6 ± 232.7                               | 12761.3 ± 9317.5                            | 6.3 ± 1.5        | 1.0 ± 0.4            | 0.5 ± 0.2     | 0.5 ± 0.2            | 0.5 ± 0.1           | 0.7 ± 0.0  |
|                | Ungrazed   | 32.8 ± 5.9                  | 62.7 ± 14.2                    | 497.3 ± 183.0                               | 11579.3 ± 3729.3                            | 4.7 ± 1.2        | 0.9 ± 0.6            | 0.5 ± 0.3     | 0.5 ± 0.3            | 0.6 ± 0.3           | 0.9 ± 0.0  |
| Tullgarn North | Grazed     | 4.7 ± 2.3                   | 31.1 ± 17.0                    | 245.1 ± 73.0                                | 10091.7 ± 4366.4                            | 5.3 ± 1.2        | 0.9 ± 0.4            | 0.5 ± 0.2     | 0.5 ± 0.3            | 0.6 ± 0.3           | 0.8 ± 0.1  |
|                | Ungrazed   | 258.3 ± 14.4                | 285.0 ± 19.0                   | 1997.1 ± 1047.5                             | 9310.0 ± 2246.5                             | 2.7 ± 1.2        | 0.3 ± 0.1            | 0.1 ± 0.0     | 0.9 ± 0.0            | 0.3 ± 0.1           | 0.9 ± 0.0  |
| Tullgarn South | Grazed     | 33.3 ± 14.4                 | 86.3 ± 5.1                     | 519.4 ± 167.0                               | 5188.3 ± 2842.8                             | 14.7 ± 1.2       | 2.3 ± 0.2            | 0.9 ± 0.0     | 0.0 ± 0.0            | 0.8 ± 0.1           | 0.8 ± 0.0  |
|                | Ungrazed   | 208.3 ± 14.4                | 228.3 ± 7.6                    | 1069.7 ± 456.7                              | 13313.3 ± 1205.4                            | 6.0 ± 1.0        | 1.1 ± 0.3            | 0.5 ± 0.2     | 0.4 ± 0.2            | 0.6 ± 0.1           | 0.8 ± 0.0  |

110

115

**Table S3: Soil characteristics of the first 50 cm. Data correspond to the mean and standard deviation (n = 3). For D50 (50 % of grain soil sample is below this grain size (µm)) and percentage of silt and clay (< 63 µm), values represent the mean of the first 50 cm of one core, and the standard deviations correspond to variation along the 50 cm depth.**

| Sites          | Management | Dry bulk density<br>(g cm <sup>-3</sup> ) | Dry matter<br>content<br>(%) | Water content<br>(%) | Organic<br>matter content<br>(%) | Silt and clay<br>(%) | D50<br>(µm)             |
|----------------|------------|-------------------------------------------|------------------------------|----------------------|----------------------------------|----------------------|-------------------------|
|                |            |                                           |                              |                      |                                  |                      | 120                     |
| Als            | Grazed     | 1.0 ± 0.1                                 | 60.7 ± 2.5                   | 50.9 ± 0.4           | 15.9 ± 1.6                       | 6 ± 7                | 256 ± 24                |
|                | Ungrazed   | 0.8 ± 0.1                                 | 56.2 ± 1.3                   | 49.5 ± 1.9           | 13.0 ± 2.6                       | 4 ± 5                | 250 ± 58                |
| Askö           | Grazed     | 0.7 ± 0.1                                 | 76.4 ± 5.3                   | 23.6 ± 5.3           | 16.8 ± 0.7                       | 11 ± 3               | 177 ± 41                |
|                | Ungrazed   | 0.3 ± 0.1                                 | 44.2 ± 7.4                   | 55.8 ± 7.4           | 29.0 ± 8.9                       | 59 ± 40              | 116 ± 148               |
| Karleby        | Grazed     | 0.7 ± 0.2                                 | 79.5 ± 7.2                   | 20.5 ± 7.2           | 5.1 ± 0.5                        | 12 ± 10              | 224 ± 50 <sup>125</sup> |
|                | Ungrazed   | 1.1 ± 0.3                                 | 76.9 ± 7.6                   | 23.1 ± 7.6           | 3.1 ± 0.5                        | 1 ± 2                | 346 ± 37                |
| Klosterfjorden | Grazed     | -                                         | -                            | -                    | -                                | -                    | -                       |
|                | Ungrazed   | 0.7 ± 0.1                                 | 80.1 ± 1.1                   | 19.9 ± 1.1           | 6.5 ± 1.1                        | 45 ± 12              | 73 ± 31                 |
| Lenholmen      | Grazed     | 0.9 ± 0.2                                 | 65.1 ± 0.4                   | 41.3 ± 9.0           | 15.5 ± 3.8                       | 78 ± 20              | 17 ± 33                 |
|                | Ungrazed   | 0.7 ± 0.1                                 | 58.1 ± 2.5                   | 44.9 ± 12.3          | 14.1 ± 2.9                       | 71 ± 30              | 42 ± 65                 |
| Naset          | Grazed     | 0.9 ± 0.1                                 | 66.5 ± 3.5                   | 33.5 ± 3.5           | 15.0 ± 4.9                       | 82 ± 24              | 20 ± 34                 |
|                | Ungrazed   | 0.3 ± 0.0                                 | 33.8 ± 3.6                   | 66.2 ± 3.6           | 29.8 ± 0.8                       | 45 ± 19              | 98 ± 54 <sup>130</sup>  |
| Söderhamn      | Grazed     | 0.9 ± 0.1                                 | 91.2 ± 2.4                   | 8.8 ± 2.4            | 1.1 ± 0.1                        | 3 ± 2                | 778 ± 86                |
|                | Ungrazed   | 0.6 ± 0.1                                 | 55.1 ± 0.6                   | 44.9 ± 0.6           | 16.6 ± 1.8                       | 34 ± 29              | 182 ± 117               |
| Seden Strand   | Grazed     | 0.7 ± 0.0                                 | 53.8 ± 0.5                   | 46.2 ± 0.5           | 12.9 ± 0.5                       | 31 ± 10              | 144 ± 65                |
|                | Ungrazed   | 0.4 ± 0.1                                 | 39.3 ± 4.6                   | 60.7 ± 4.6           | 21.2 ± 3.3                       | 35 ± 6               | 119 ± 55                |
| Sundsvall      | Grazed     | 0.7 ± 0.0                                 | 73.1 ± 2.2                   | 26.9 ± 2.2           | 14.3 ± 3.6                       | 55 ± 21              | 69 ± 42                 |
|                | Ungrazed   | 0.7 ± 0.1                                 | 58.2 ± 3.1                   | 41.8 ± 3.1           | 19.4 ± 5.5                       | 61 ± 31              | 73 ± 81                 |
| Trondheim      | Grazed     | 1.0 ± 0.3                                 | 61.1 ± 9.8                   | 50.3 ± 5.1           | 13.6 ± 5.5                       | 37 ± 7               | 99 ± 27 <sup>135</sup>  |
|                | Ungrazed   | 1.1 ± 0.1                                 | 67.6 ± 0.6                   | 50.4 ± 5.9           | 4.6 ± 0.8                        | 50 ± 32              | 121 ± 104               |
| Tullgarn North | Grazed     | 0.9 ± 0.3                                 | 64.7 ± 7.2                   | 35.3 ± 7.2           | 12.3 ± 6.0                       | 38 ± 24              | 169 ± 194               |
|                | Ungrazed   | 0.2 ± 0.1                                 | 31.2 ± 5.9                   | 68.8 ± 5.9           | 24.8 ± 5.1                       | 62 ± 20              | 46 ± 32                 |
| Tullgarn South | Grazed     | 0.8 ± 0.1                                 | 66.0 ± 6.9                   | 34.0 ± 6.9           | 12.1 ± 5.3                       | 54 ± 17              | 58 ± 26                 |
|                | Ungrazed   | 0.2 ± 0.0                                 | 32.5 ± 2.0                   | 67.5 ± 2.0           | 19.2 ± 0.8                       | 52 ± 7               | 59 ± 15                 |

145 **Table S4: Total organic carbon and nitrogen stocks in aboveground and belowground biomass, and soil (Mg ha<sup>-1</sup>) in Nordic salt marshes. Data correspond to the mean and standard deviation (n = 3).**

| Sites          | Management | Aboveground<br>OC stock<br>(Mg ha <sup>-1</sup> ) | Aboveground<br>N stock<br>(Mg ha <sup>-1</sup> ) | Belowground<br>OC stock<br>(Mg ha <sup>-1</sup> ) | Belowground<br>N stock<br>(Mg ha <sup>-1</sup> ) | Soil<br>OC stock<br>(Mg ha <sup>-1</sup> ) | Soil<br>N stock<br>(Mg ha <sup>-1</sup> ) |
|----------------|------------|---------------------------------------------------|--------------------------------------------------|---------------------------------------------------|--------------------------------------------------|--------------------------------------------|-------------------------------------------|
| Als            | Grazed     | 1.1 ± 0.4                                         | 0.04 ± 0.01                                      | 24.3 ± 4.5                                        | 0.74 ± 0.23                                      | 104.8 ± 9.4                                | 9.0 ± 0.3                                 |
|                | Ungrazed   | 5.8 ± 2.7                                         | 0.15 ± 0.07                                      | 36.5 ± 13.5                                       | 1.24 ± 0.42                                      | 86.1 ± 19.5                                | 7.2 ± 0.3                                 |
| Askö           | Grazed     | 1.1 ± 0.3                                         | 0.05 ± 0.02                                      | 40.3 ± 15.0                                       | 1.10 ± 0.56                                      | 77.1 ± 30.8                                | 6.5 ± 1.2                                 |
|                | Ungrazed   | 6.1 ± 2.1                                         | 0.19 ± 0.08                                      | 18.1 ± 3.8                                        | 0.24 ± 0.03                                      | 39.1 ± 21.4                                | 3.3 ± 0.9                                 |
| Karleby        | Grazed     | 1.3 ± 0.1                                         | 0.05 ± 0.00                                      | 31.2 ± 3.4                                        | 0.70 ± 0.05                                      | 33.1 ± 14.1                                | 2.9 ± 0.6                                 |
|                | Ungrazed   | 16.0 ± 9.2                                        | 0.49 ± 0.30                                      | 24.0 ± 15.9                                       | 0.67 ± 0.32                                      | 20.0 ± 9.6                                 | 2.2 ± 0.2                                 |
| Klosterfjorden | Grazed     | -                                                 | -                                                | -                                                 | -                                                | -                                          | -                                         |
|                | Ungrazed   | 11.4 ± 6.6                                        | 0.40 ± 0.17                                      | 17.0 ± 9.2                                        | 0.51 ± 0.14                                      | 86.6 ± 40.2                                | 7.4 ± 2.1                                 |
| Lenholmen      | Grazed     | 0.6 ± 0.1                                         | 0.03 ± 0.01                                      | 40.2 ± 15.5                                       | 0.66 ± 0.24                                      | 153.0 ± 22.0                               | 10.9 ± 1.6                                |
|                | Ungrazed   | 2.4 ± 0.2                                         | 0.06 ± 0.01                                      | 46.4 ± 18.4                                       | 1.06 ± 0.52                                      | 98.8 ± 17.8                                | 6.8 ± 1.2                                 |
| Naset          | Grazed     | 1.1 ± 0.3                                         | 0.02 ± 0.01                                      | 22.3 ± 5.7                                        | 0.83 ± 0.31                                      | 103.9 ± 49.4                               | 8.7 ± 2.2                                 |
|                | Ungrazed   | 6.3 ± 0.5                                         | 0.18 ± 0.15                                      | 72.4 ± 22.5                                       | 1.43 ± 0.24                                      | 96.9 ± 17.9                                | 7.8 ± 0.6                                 |
| Söderhamn      | Grazed     | 2.0 ± 0.2                                         | 0.05 ± 0.01                                      | 9.6 ± 1.8                                         | 0.28 ± 0.05                                      | 12.2 ± 6.9                                 | 1.3 ± 0.2                                 |
|                | Ungrazed   | 3.1 ± 0.6                                         | 0.06 ± 0.05                                      | 24.5 ± 9.9                                        | 0.24 ± 0.06                                      | 26.4 ± 8.0                                 | 2.4 ± 0.2                                 |
| Seden Strand   | Grazed     | 1.3 ± 0.5                                         | 0.09 ± 0.04                                      | 16.2 ± 6.6                                        | 1.02 ± 0.37                                      | 183.1 ± 25.2                               | 17.9 ± 2.4                                |
|                | Ungrazed   | 3.1 ± 1.3                                         | 0.09 ± 0.08                                      | 30.0 ± 0.5                                        | 1.33 ± 0.07                                      | 173.1 ± 52.7                               | 15.8 ± 5.0                                |
| Sundsvall      | Grazed     | 2.3 ± 0.7                                         | 0.07 ± 0.02                                      | 31.0 ± 9.9                                        | 0.78 ± 0.32                                      | 50.4 ± 5.6                                 | 4.0 ± 0.2                                 |
|                | Ungrazed   | 7.2 ± 0.9                                         | 0.22 ± 0.07                                      | 15.7 ± 4.2                                        | 0.28 ± 0.12                                      | 61.1 ± 18.4                                | 5.0 ± 0.8                                 |
| Trondheim      | Grazed     | 2.6 ± 1.0                                         | 0.06 ± 0.02                                      | 49.1 ± 35.2                                       | 1.76 ± 1.31                                      | 132.7 ± 66.6                               | 9.1 ± 4.1                                 |
|                | Ungrazed   | 2.0 ± 0.8                                         | 0.06 ± 0.02                                      | 40.0 ± 12.6                                       | 1.29 ± 0.41                                      | 86.6 ± 8.8                                 | 6.2 ± 0.7                                 |
| Tullgarn North | Grazed     | 1.0 ± 0.3                                         | 0.05 ± 0.01                                      | 32.2 ± 14.2                                       | 1.03 ± 0.47                                      | 109.3 ± 16.5                               | 9.2 ± 1.0                                 |
|                | Ungrazed   | 8.8 ± 4.7                                         | 0.32 ± 0.15                                      | 35.7 ± 8.7                                        | 0.96 ± 0.23                                      | 90.5 ± 24.4                                | 7.2 ± 2.2                                 |
| Tullgarn South | Grazed     | 2.2 ± 0.7                                         | 0.09 ± 0.04                                      | 11.3 ± 6.3                                        | 0.51 ± 0.27                                      | 137.0 ± 53.8                               | 11.1 ± 3.2                                |
|                | Ungrazed   | 4.5 ± 2.0                                         | 0.18 ± 0.06                                      | 45.6 ± 6.0                                        | 1.40 ± 0.18                                      | 73.3 ± 11.7                                | 5.7 ± 0.6                                 |
